# Supplementary material
Source: JCI journal article supplement (doi:10.1172/jci130441)
Supplement: sd1 [file 1]

## APPENDIX 1: Kinetic model of myocardial catecholaminergic neurodegeneration in Lewy body diseases

We are given reaction rates as follows:

$$r^0 = (r_1^0, \dots, r_{17}^0)^T.$$

The problem is to find reaction rates  $r = (r_1, \dots, r_{17})^T$  that satisfy exactly the equilibrium system and are as close as possible to the vector  $r^0$ .

Consider the following equilibrium system:

$$Ar = 0, \quad A \in \mathbb{R}^{m \times n}, r = (r_1, \dots, r_n)^T \in \mathbb{R}^n, m = 9, n = 17,$$

where  $r$  is the vector of unknown equilibrium reaction rates.

The singular value decomposition of  $A$  is:

$$(1) \quad A = U\Sigma V^T, \quad U \in \mathbb{R}^{m \times m}, \quad \Sigma \in \mathbb{R}^{m \times n}, \quad V \in \mathbb{R}^{n \times n},$$

where  $U$  and  $V$  are orthogonal and  $\Sigma$  is diagonal. This gives  $\text{rank}(A) = m$  (the number of non-zero elements in the matrix  $\Sigma$ ).

Using the fact that:

$$x \in N(A) \Rightarrow x = \sum_{i=m+1}^n c_i v_i, \quad \text{where } V = [v_1 \dots v_n],$$

the general solution of (1) is:

$$(2) \quad r = \sum_{i=m+1}^n c_{i-m} v_i$$

for arbitrary constants  $c_1, \dots, c_{n-m}$

To find  $c_1, \dots, c_{n-m}$ , we solve the system,

$$\sum_{i=m+1}^n c_{i-m} v_i = r^0$$

or, in the matrix form,

$$(3) \quad Bc = r^0, \quad r^0 = [r_1^0, \dots, r_n^0]^T, \quad B = [b_1 \dots b_{n-m}] \equiv [v_{m+1} \dots v_n], \quad c = (c_1, \dots, c_{n-m})^T.$$

Since there are  $n - m = 8$  unknowns and  $n = 17$  equations, we use the least squares method for the solution:

$$(4) \quad \min_c \|Bc - r^0\|_2.$$

The equilibrium reaction rates are given by:

$$(5) \quad r = Bc$$

To get the best % accuracy (equilibrating the % error for all the rates, we replace (3) by a scaled problem:

$$(6) \quad B_s c_s = r_s^0, \quad B_s = \begin{bmatrix} b_{1,1}/r_1^0 & \dots & b_{1,n-m}/r_1^0 \\ \dots & \dots & \dots \\ b_{n,1}/r_n^0 & \dots & b_{n,n-m}/r_n^0 \end{bmatrix}, \quad r_s^0 = (1, \dots, 1)^T \in \mathbb{R}^n$$

We use the least squares method for the solution.

$$(7) \quad \min_{c_s} \|B_s c_s - r_s^0\|_2.$$

Then the optimal equilibrium reaction rates are given by:

$$(8) \quad r = B_s c_{ss}, \quad \text{where } c_{ss} = \begin{bmatrix} (c_s)_1 \cdot r_1^0 \\ \dots \\ (c_s)_n \cdot r_n^0 \end{bmatrix}.$$

## APPENDIX 2: Model Assumptions and Calculations

### *Reaction rates*

(1) TYR\_Uptake: Uptake of tyrosine into the cytoplasm of the neurons was the input into the model. TYR\_Uptake was assumed to occur at a constant rate—i.e., a zero-order kinetic process. TYR\_Uptake was estimated from the literature, as follows. It was assumed that the compared groups had the same coronary sinus plasma flow (95 mL/min) and the same plasma tyrosine concentration (65 nmol/mL) (45), so that the tyrosine delivery rate to the myocardium was 6,175 nmol/min. It was also assumed that 1% of the myocardium is nerves and that 90% of the nerves is cytoplasm, so that the tyrosine delivery rate to the cytoplasm was estimated to be 55.6 nmol/min in the control group.

The amounts of catechols in myocardial tissue were assumed to reflect some combination of loss of innervation and functional abnormalities in the residual myocardial sympathetic noradrenergic nerves. Across 6 studies the left ventricular concentration of immunoreactive TH, an index of innervation, has been reported to be decreased by a mean of 74.4% in PD compared to controls (12-16). TYR\_Uptake in the Lewy body disease group therefore was set at 0.256 times that in the control group.

(2) TYR\_Loss: The rate of loss of cytoplasmic tyrosine from the nerves was calculated from  $\text{TYR\_Uptake} - \text{TH}$ .

(3) TH: The rate of conversion of cytoplasmic tyrosine to cytoplasmic 3,4-dihydroxyphenylalanine (DOPA) via TH was calculated from the sum of  $\text{LAAAD} + \text{DOPAc\_Loss}$ .

(4) LAAAD: The rate of cytoplasmic dopamine (DA) from cytoplasmic DOPA via LAAAD was calculated from the sum of  $\text{MAO\_DA} + \text{MAO\_NE} + \text{NE\_Release}$ .

(5) DOPAc\_Loss: Empirical spillover rates of DOPA were determined, according to the equation

$$Q * ([\text{DOPAv}] - [\text{DOPAa}])) + 0.08 * Q * [\text{DOPAa}]$$

where  $[DOPA_v]$ =coronary sinus plasma concentration of DOPA and  $[DOPA_a]$ =arterial plasma concentration of DOPA (46). Extraneuronal loss of DOPA by metabolism was assumed to be negligible.

(6) VMAT\_DA: The rate of vesicular uptake of cytoplasmic DA via the vesicular monoamine transporter (VMAT) was calculated from  $LAAAD - MAO\_DA + DA\_Leak$ .

(7) MAO\_DA: The rate of conversion of cytoplasmic DA to cytoplasmic 3,4-dihydroxyphenylacetic acid (DOPAC) via monoamine oxidase (MAO) was determined empirically from the DOPAC spillover rate, according to the equation

$$Q * ([DOPAC_v] - [DOPAC_a]).$$

where  $[DOPAC_v]$ =coronary sinus venous DOPAC concentration and  $[DOPAC_a]$ = arterial DOPAC concentration.

(8) DOPACc\_Loss: The rate of loss of cytoplasmic DOPAC from the nerves was assumed to be the same as MAO\_DA.

(9) DBH: The rate of production of vesicular norepinephrine (NE) from vesicular DA was calculated from  $NE\_Leak + NE\_Release - VMAT\_NE$ .

(10) DA\_Leak: In the control group the rate of loss of vesicular DA to the cytoplasm via leakage was calculated as 1.14% per minute \* the vesicular DA amount ( $DA_v$ ) (28). When septal  $^{18}F$ -dopamine-derived radioactivity is tracked over time between the peak value (about 8') and the midpoint of the 10' frame ending at 30' from the start of  $^{18}F$ -DA injection, the mono-exponential slope of decline (k $_{8'-25'}$ ) is greater in Lewy body patients than in controls.(36) In controls k $_{8'-25'}$  averages  $0.01819 \pm (SEM) 0.00133 \text{ min}^{-1}$  and in Lewy body  $0.03711 \pm 0.00341 \text{ min}^{-1}$  (unpublished updated data). This means k $_{8'-25'}$  in Lewy body disease patients is  $0.03711 / 0.01819 = 2.04$  times control. We used  $2.04 * 1.14\% = 2.33\%$  as the leakage percent of vesicular DA per minute for the Lewy body disease group.

(11) VMAT\_NE: The NEc vesicular uptake rate was calculated from  $U1 + NE\_Leak - MAO\_NE$ .

(12) MAO\_NE: The rate of 3,4-dihydroxyphenylglycol (DHPG) spillover was calculated from the empirical arteriovenous production rates of DHPG, by the equation

$$Q * ([DHPGv] - [DHPGa]), + 0.7 * Q * [DHPGa]$$

where [DHPGv]=coronary sinus plasma DHPG concentration and [DHPGa]=arterial plasma DHPG concentration (46). The rate of extraneuronal DHPG loss from metabolism was assumed to be 57.89% of DHPG (28). The DHPG production rate, MAO\_NE, was then taken as the sum of the DHPG spillover rate and the estimated rate of extraneuronal DHPG loss from metabolism, or 1.5789 \* the DHPG spillover rate.

(13) Leak\_NE: The rate of leakage rate of vesicular NE to the cytoplasm was calculated as the same percent of the vesicular NE amount (NEv) as for DAv\_Leak above.

(14) NE\_Release: The rate of NE release from the vesicles into the extracellular fluid was calculated from U1 + NEe\_Loss.

(15) U1: The rate of neuronal uptake of NE via the cell membrane norepinephrine transporter (NET) was obtained empirically from (1 - E) \* [NEa] (47).

(16) DHPGc\_Loss: The rate of loss of cytoplasmic DHPG from the nerves was assumed to be equal to MAO\_NE.

(17) NEe\_Loss: The rate of loss of extracellular fluid NE from the model was calculated based on empirical values for the rate of appearance of endogenous NE in the coronary sinus plasma (NE spillover), which is the sum of the arteriovenous production rate between the arterial and coronary sinus plasma plus the arterial plasma NE removal rate, i.e.,

$$Q * ([NEv] - [NEa]) + Q * E * [NEa] =$$

$$Q * (([NEv] - [NEa]) + E * [NEa]) =$$

$$Q * (([NEv] + (1 - E) * [NEa])$$

where Q = coronary sinus plasma flow, in mL/min, [NEv]= coronary sinus plasma NE concentration, [NEa]=arterial plasma NE concentration, and E= extraction fraction of <sup>3</sup>H- NE during systemic intravenous infusion of a tracer amount of <sup>3</sup>H- NE. NEe\_Loss was taken from

the sum of NE spillover and the amount of extraneuronal NE lost from metabolism, or  $2.135 * \text{NE spillover}$  (28).

For the reactants and reactions depicted in Figure 1, differential equations were produced, as follows.

- (1) 
$$d[\text{TYRc}]/dt = k_{\text{TYR\_Uptake}} - (k_{\text{TH}} + k_{\text{TYR\_Loss}}) * [\text{TYRc}]$$
- (2) 
$$d[\text{DOPAc}]/dt = k_{\text{TH}} * [\text{TYRc}] - (k_{\text{DOPA\_Loss}} + k_{\text{LAAAD}}) * [\text{DOPAc}]$$
- (3) 
$$d[\text{DAv}]/dt = k_{\text{VMAT\_DA}} * [\text{DAc}] - (k_{\text{Leak\_DA}} + k_{\text{DBH}}) * [\text{DAv}]$$
- (4) 
$$d[\text{DAc}]/dt = k_{\text{LAAAD}} * [\text{DOPAc}] + k_{\text{Leak\_DA}} * [\text{DAv}] - (k_{\text{MAO\_DA}} + k_{\text{VMAT\_DA}}) * [\text{DAc}]$$
- (5) 
$$d[\text{DOPAcC}]/dt = k_{\text{MAO\_DA}} * [\text{DAc}] - k_{\text{DOPAc\_Loss}} * [\text{DOPAcC}]$$
- (6) 
$$d[\text{NEv}]/dt = k_{\text{DBH}} * [\text{DAv}] + k_{\text{VMAT\_NE}} * [\text{NEc}] - (k_{\text{Leak\_NE}} + k_{\text{NE\_Release}}) * [\text{NEv}]$$
- (7) 
$$d[\text{NEc}]/dt = k_{\text{Leak\_NE}} * [\text{NEv}] + k_{\text{U1}} * [\text{NEe}] - (k_{\text{VMAT\_NE}} + k_{\text{MAO\_NE}}) * [\text{NEc}]$$
- (8) 
$$d[\text{DHPGc}]/dt = k_{\text{MAO\_NE}} * [\text{NEc}] - k_{\text{DHPG\_Loss}} * [\text{DHPGc}]$$
- (9) 
$$d[\text{NEe}]/dt = k_{\text{NE\_Release}} * [\text{NEv}] - k_{\text{U1}} * [\text{NEe}]$$

where the reactant abbreviations were:

- (1) TYRc=cytoplasmic tyrosine, (2) DOPAc=cytoplasmic 3,4-dihydroxyphenylalanine, (3) DAV=vesicular dopamine, (4) DAc=cytoplasmic dopamine, (5) DOPAcC=cytoplasmic 3,4-dihydroxyphenylacetic acid; (6) NEv=vesicular norepinephrine, (7) NEc=cytoplasmic norepinephrine, (8) DHPGc=cytoplasmic 3,4-dihydroxyphenylglycol; and (9) NEe=norepinephrine in the extracellular fluid

and the reaction abbreviations were: (1) TYR\_Uptake=neuronal uptake of tyrosine, (2) TYR\_Loss=loss of tyrosine from the nerves, (3) TH=tyrosine hydroxylase, (4) LAAAD=L-aromatic-amino-acid decarboxylase, (5) DOPA\_Loss=loss of DOPAC from the nerves, (6) VMAT\_DA=vesicular uptake of cytoplasmic DA via the VMAT, (7) MAO\_DA=MAO acting on cytoplasmic DA, (8) DOPAC\_Loss=loss of DOPAC from the nerves, (9) DBH=DA-beta-

hydroxylase acting on vesicular DA to form vesicular NE, (10) Leak\_DA=leakage of vesicular DA into the cytoplasm, (11) VMAT\_NE=vesicular uptake of cytoplasmic NE via the VMAT, (12) MAO\_NE=monoamine oxidase acting on cytoplasmic norepinephrine to form DHPG, (13) Leak\_NE=leakage of vesicular NE into the cytoplasm, (14) NE\_Release=NE release by vesicular exocytosis, (15) U1=neuronal uptake of NE via the cell membrane norepinephrine transporter (NET), (16) DHPG\_Loss=loss of DHPG from the nerves, and (17) NE\_Loss=loss of extracellular NE from the nerves.

Rate constants for the 17 reactions were obtained via the above equations, assuming equilibrium conditions (i.e.,  $d[\text{Reactant}]/dt = 0$ ). Graphs of predicted effects of altering values for rate constants were generated using software we developed (48).

#### *Reactant amounts*

Amounts of NE and DA in the vesicles (NE<sub>v</sub> and DA<sub>v</sub>) were obtained empirically from the myocardial tissue concentrations of NE and DA, with the presumptions that all of myocardial tissue NE and DA was in the vesicles, myocardial mass was 545 grams, and myocardial tissue density was 1.0 g/mL.

Amounts of DOPA, DOPAC, and DHPG in the cytoplasm (DOPAc, DOPAc<sub>c</sub>, and DHPG<sub>c</sub>) were obtained empirically from the myocardial tissue concentrations. It was assumed that all of myocardial tissue DOPA, DOPAC, and DHPG was in nerves.

It was difficult to estimate cytoplasmic DA (DA<sub>c</sub>) and cytoplasmic NE (NE<sub>c</sub>) amounts because of the lack of empirical data. A method for estimating DA<sub>c</sub> and NE<sub>c</sub> was based on the myocardial tissue concentration of 5-S-cysteinyl-dopamine (Cys-DA) (33, 49). Cys-DA is a product of the spontaneous oxidation of cytoplasmic DA (50). Empirical data for myocardial Cys-DA were compared with those for DOPAC in the same samples, and the ratio of Cys-DA / DOPAC was found to be about 1/10. Previous literature indicated that DA is a somewhat better substrate than is NE for the VMAT, by a factor of 1.23,(51) and the k<sub>VMAT</sub> for <sup>18</sup>F-DA is 2.50 min<sup>-1</sup> (31). The avidity of <sup>18</sup>F-DA for the VMAT was assumed to be the same as that of

cytoplasmic NE, so that the value for  $k_{VMAT\ DA}$  was  $2.50 * 1.23 = 3.08 \text{ min}^{-1}$ . From the equation

$$DAc = DA \text{ vesicular uptake rate} / k_{VMAT\_DA}$$

In the control group  $DAc = 1.86 \text{ nmol/min} / 3.08 \text{ min}^{-1} = 0.60 \text{ nmoles} = DOPACc / 41.6$ .

In the Lewy body group  $DAc$  therefore was estimated to be  $2 / 41.6 = 0.05 \text{ nmoles}$ .

Analogously,  $NEc$  was taken to be equal to  $DHPGc / 33.8$ , for  $NEc$  values of  $2.1 \text{ nmoles}$  in controls and  $0.27 \text{ nmoles}$  in Lewy body patients.

## REFERENCES

45. Melamed E, Glaeser B, Growdon JH, Wurtman RJ. Plasma tyrosine in normal humans: effects of oral tyrosine and protein-containing meals. *J Neural Transm.* 1980;47(4):299–306.
46. Goldstein DS, et al. Regional extraction of circulating norepinephrine, DOPA, and dihydroxyphenylglycol in humans. *J Auton Nerv Syst.* 1991;34(1):17–35.
47. Goldstein DS, Brush JE, Eisenhofer G, Stull R, Esler M. In vivo measurement of neuronal uptake of norepinephrine in the human heart. *Circulation.* 1988;78(1):41–48.
48. Bindel D, Friedman M, Govaerts W, Hughes J, Kuznetsov YA. Numerical computation of bifurcations in large equilibrium systems in MATLAB. *J Comput Appl Math.* 2014;261:232–48.
49. Cheng FC, Kuo JS, Chia LG, Dryhurst G. Elevated 5-S-cysteinyldopamine/homovanillic acid ratio and reduced homovanillic acid in cerebrospinal fluid: possible markers for and potential insights into the pathoetiology of Parkinson's disease. *J Neural Transm (Vienna).* 1996;103(4):433–446.
50. Goldstein DS, Jinsmaa Y, Sullivan P, Sharabi Y. N-Acetylcysteine prevents the increase in spontaneous oxidation of dopamine during monoamine oxidase inhibition in PC12 cells. *Neurochem Res.* 2017;42(11):3289–3295.
51. Ferris RM, Tang FL. Comparison of the effects of the isomers of amphetamine, methylphenidate and deoxypipradrol on the uptake of l-[3H]norepinephrine and [3H]dopamine by synaptic vesicles from rat whole brain, striatum and hypothalamus. *J Pharmacol Exp Ther.* 1979;210(3):422–428.

## GRAPHICAL ABSTRACT

Sites of functional abnormalities of catecholamine synthesis, storage, release, recycling, and metabolism in myocardial sympathetic nerves in Lewy body disease.

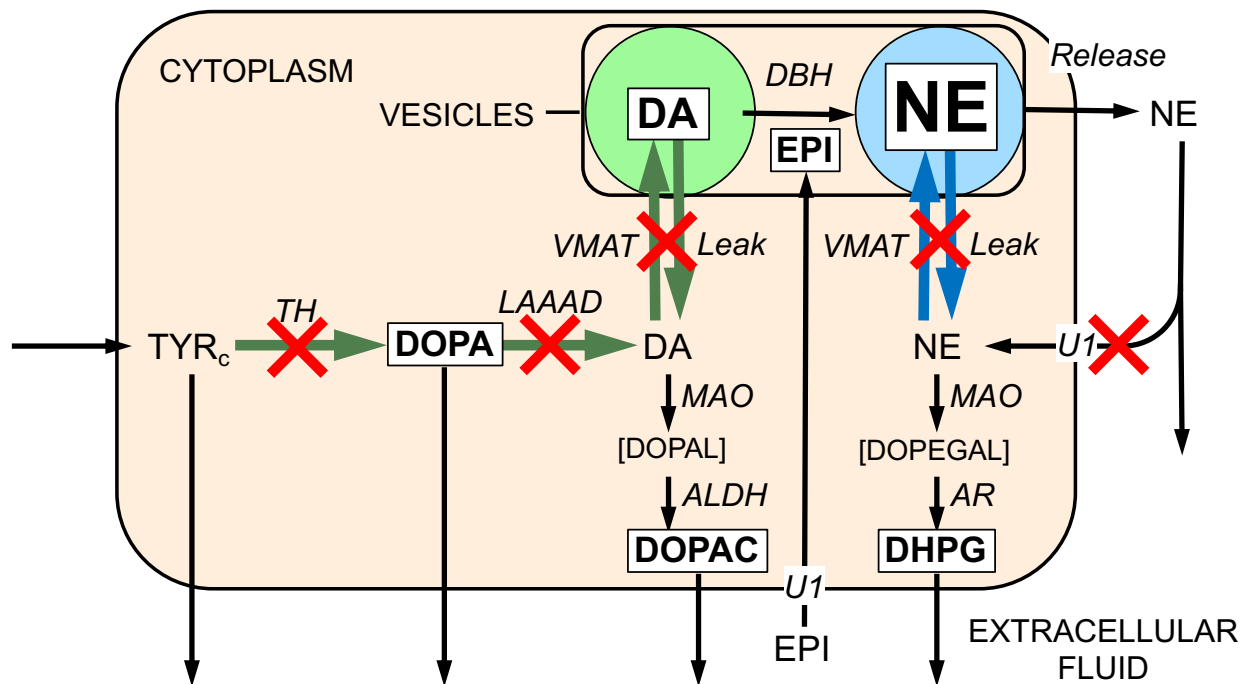

Reactions are in italics and amounts of reactants in plain text. Font sizes correspond roughly to amounts of reactants. Green arrows indicate dopamine (DA) synthesis and blue arrows norepinephrine (NE) vesicular uptake and leakage. Red X marks placed to indicate sites of abnormalities in residual sympathetic nerves in Lewy body diseases. Application of a kinetic model to previously published data revealed 3 types of abnormal intra-neuronal processes in the Lewy body disease group—(a) attenuated catecholamine biosynthesis via tyrosine hydroxylase and L-aromatic-amino-acid decarboxylase, (b) impaired vesicular sequestration of cytoplasmic catecholamines, reflecting the balance of vesicular uptake vs. leakage, and (c) inefficient recycling of released NE by reuptake through the cell membrane NE transporter. Predictions from the model were tested in coded samples of post-mortem myocardial tissue from PD patients and controls, and the results confirmed the model-generated abnormal “triple hit” pattern. Other abbreviations: ALDH=aldehyde dehydrogenase; AR=aldehyde/aldose reductase; Cys-DA=5-S-cysteinylda; Cys-DOPA= 5-S-cysteinyldopa; DAC=cytoplasmic DA; DBH=dopamine-beta-hydroxylase; DHPG=3,4-dihydroxyphenylglycol; DOPAc=cytoplasmic DOPA; DOPAC=3,4-dihydroxyphenylacetic acid; DOPEGAL=3,4-dihydroxyphenylglycolaldehyde; DOPAL =3,4-dihydroxyphenylacetaldehyde; DOPET=3,4-dihydroxyphenylethanol; EPI=epinephrine; LAAAD=L-aromatic-amino-acid decarboxylase; MAO=monoamine oxidase; NEc=cytoplasmic NE; NEe=NE in the extracellular fluid ; NESO=NE entering the cardiac venous drainage; TH=tyrosine hydroxylase; TYR=tyrosine; TYRc=cytoplasmic TYR; U1=Uptake-1=neuronal uptake; U2=Uptake-2=extraneuronal uptake; VMAT=vesicular monoamine transporter.

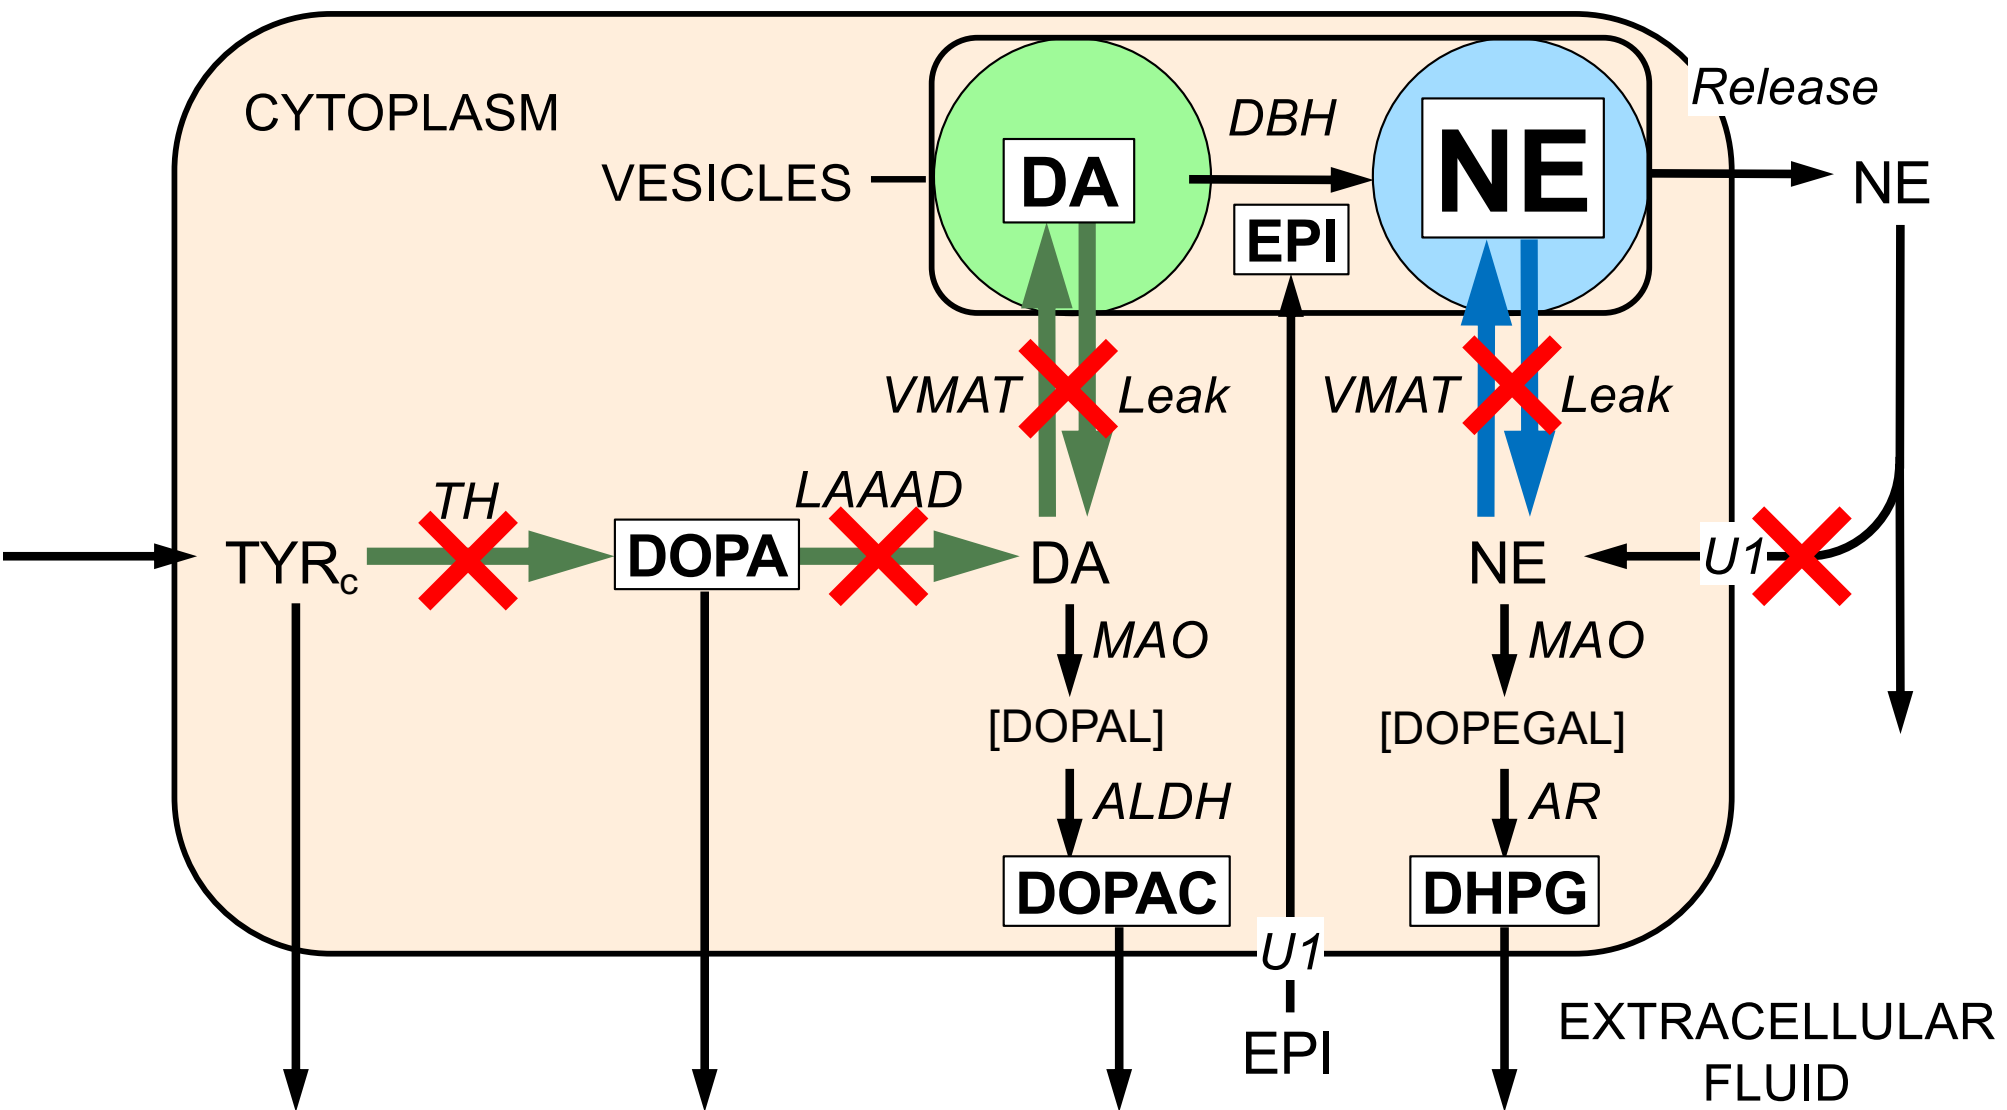

| Patient           | Diagnosis | DHPG    | NE      | DOPA    | DA      | DOPAC   | LOG DHPG    | LOG NE      | LOG DOPA    | LOG DA      | LOG DOPAC   |
|-------------------|-----------|---------|---------|---------|---------|---------|-------------|-------------|-------------|-------------|-------------|
|                   |           | pmol/mg | pmol/mg | pmol/mg | pmol/mg | pmol/mg | pmol/mg wet |
| 1                 | Control   | 0.02875 | 0.59224 | 0.16196 | 0.11818 | 0.05921 | -1.54143    | -0.22750    | -0.79060    | -0.92747    | -1.22758    |
| 2                 | Control   | 0.37610 | 4.81572 | 0.22736 | 0.09682 | 0.08572 | -0.42469    | 0.68266     | -0.64329    | -1.01406    | -1.06692    |
| 3                 | Control   | 0.04440 | 0.63669 | 0.47845 | 0.01799 |         | -1.35262    | -0.19607    | -0.32016    | -1.74491    |             |
| 4                 | Control   | 0.21222 | 2.77304 | 0.28807 | 0.04117 | 0.00163 | -0.67321    | 0.44296     | -0.54050    | -1.38539    | -2.78707    |
| 5                 | Control   | 0.00883 | 2.43192 | 0.48217 | 0.01604 | 0.00197 | -2.05388    | 0.38595     | -0.31680    |             | -2.70540    |
| 6                 | Control   | 0.02088 | 2.62714 | 0.82561 | 0.00805 | 0.01058 | -1.68017    | 0.41948     | -0.08323    | -2.09434    | -1.97541    |
| 7                 | Control   | 0.03924 | 1.64858 | 0.23193 | 0.03248 | 0.01006 | -1.40632    | 0.21711     | -0.63465    | -1.48834    | -1.99742    |
| 8                 | Control   | 0.12059 | 1.01065 | 0.15127 | 0.02026 | 0.02798 | -0.91870    | 0.00460     | -0.82025    | -1.69333    | -1.55321    |
| 9                 | Control   | 0.04013 | 1.51657 | 0.14751 | 0.26384 | 0.05938 | -1.39657    | 0.18086     | -0.83118    | -0.57866    | -1.22635    |
| 10                | Control   | 0.13529 | 1.96154 | 0.22538 | 0.06275 | 0.03393 | -0.86872    | 0.29260     | -0.64708    | -1.20242    | -1.96943    |
| 11                | Control   | 0.04941 | 1.61893 | 0.17208 | 0.12418 | 0.06369 | -1.30617    | 0.20923     | -0.76427    | -0.90594    | -1.19593    |
| 12                | Control   | 0.87250 | 5.22308 | 0.13936 | 0.14572 | 0.19316 | -0.05923    | 0.71793     | -0.85587    | -0.83648    | -0.71409    |
| 13                | Control   | 0.09235 | 3.22840 | 0.13807 | 0.28039 | 0.10536 | -1.03455    | 0.50899     | -0.85990    | -0.55223    | -0.97734    |
| 14                | Control   | 0.08676 | 1.15325 | 0.10794 | 0.02086 | 0.01345 | -1.06167    | 0.06193     | -0.96683    | -1.68071    | -1.87137    |
| 15                | Control   | 0.21568 | 1.20296 | 0.14473 | 0.08250 | 0.10193 | -0.66620    | 0.08025     | -0.83945    | -1.08354    | -0.99170    |
| 16                | Control   | 0.23168 | 2.62899 | 0.17160 | 0.08848 | 0.08381 | -0.63511    | 0.41979     | -0.76548    | -1.05314    | -1.07669    |
| 17                | Control   | 0.04319 | 1.37633 | 0.07896 | 0.06228 | 0.01539 | -1.36465    | 0.13872     | -1.10262    | -1.20564    | -1.81289    |
| 18                | Control   | 0.03666 | 1.60237 | 0.16696 | 0.03468 | 0.01357 | -1.43580    | 0.20476     | -0.77738    | -1.45991    | -1.86734    |
| 19                | Control   | 0.03821 | 2.28806 | 0.09226 | 0.10157 | 0.01131 | -1.41786    | 0.35947     | -1.03497    | -0.99323    | -1.94641    |
| 20                | Control   | 0.01904 | 0.56190 | 0.11727 | 0.47344 | 0.11811 | -1.72028    | -0.25034    | -0.93083    | -0.32473    | -0.92771    |
| 21                | Control   | 0.03021 | 4.23257 | 0.09192 | 0.64554 | 0.03670 | -1.51982    | 0.62660     | -1.03657    | -0.19008    | -1.43528    |
| 22                | Control   | 0.06272 | 3.15547 | 0.11641 | 0.58668 | 0.08477 | -1.20259    | 0.49906     | -0.93400    | -0.23160    | -1.07175    |
| 23                | Control   | 0.03423 | 1.45721 | 0.10712 | 0.11380 | 0.01067 | -1.46554    | 0.16352     | -0.97014    | -0.94384    | -1.97171    |
| 24                | Control   | 0.02647 | 2.09231 | 0.23198 | 0.11895 | 0.00536 | -1.57724    | 0.32063     | -0.63455    | -0.92462    | -2.27107    |
| 25                | Control   | 0.03059 | 1.75740 | 0.25178 | 0.02680 | 0.00655 | -1.51445    | 0.24487     | -0.59898    | -1.57191    | -2.18392    |
| 26                | Control   | 0.00000 | 1.28107 | 1.43096 | 0.06732 | 0.00595 |             | 0.10757     | 0.15563     | -1.17185    | -2.22531    |
| MEAN              | Control   | 0.11139 | 2.11055 | 0.26073 | 0.14041 | 0.04641 | -1.21190    | 0.25445     | -0.71323    | -1.09033    | -1.62197    |
| SEM               | Control   | 0.03499 | 0.24068 | 0.05644 | 0.03400 | 0.00966 | 0.09149     | 0.05054     | 0.05834     | 0.09722     | 0.11452     |
| N                 | Control   | 26      | 26      | 26      | 26      | 25      | 25          | 26          | 26          | 25          | 25          |
| Patient           | Diagnosis | DHPG    | NE      | DOPA    | DA      | DOPAC   | LOG DHPG    | LOG NE      | LOG DOPA    | LOG DA      | LOG DOPAC   |
|                   |           | pmol/mg | pmol/mg | pmol/mg | pmol/mg | pmol/mg | pmol/mg wet |
| 1                 | Lewy      | 0.07671 | 0.03428 | 0.12886 | 0.00701 | 0.00327 | -1.11517    | -1.46493    | -0.88989    | -2.15403    | -2.48504    |
| 2                 | Lewy      | 0.00000 | 0.00742 | 0.00502 | 0.00000 | 0.00000 |             | -2.12940    | -2.29971    |             |             |
| 3                 | Lewy      |         | 0.00000 | 0.07646 | 0.00276 | 0.00000 |             |             | -1.11659    |             |             |
| 4                 | Lewy      | 0.00108 | 0.00573 | 0.10412 | 0.00250 | L-DOPA? | -2.96540    | -2.24166    | -0.98245    | -2.60257    |             |
| 5                 | Lewy      | 0.00103 | 0.01850 | 0.39130 | 0.00000 | 0.00330 | -2.98871    | -1.73275    | -0.40749    |             | -2.48190    |
| 6                 | Lewy      | 0.34751 | 0.01313 | 0.32092 | 0.00207 | 0.06177 | -0.45903    | -1.88189    | -0.49360    | -2.68489    | -1.20922    |
| 7                 | Lewy      | 0.00186 | 0.04812 | 0.12585 | 0.00204 |         | -2.73004    | -1.31770    | -0.90013    | -2.68956    |             |
| 8                 | Lewy      | 0.00000 | 0.03557 | 0.12265 | 0.00192 | 0.00683 |             | -1.44898    | -0.91132    |             | -2.16544    |
| 9                 | Lewy      | 0.00678 | 0.00769 | 0.36254 |         | 0.00438 | -2.16882    | -2.11433    | -0.44064    |             | -2.35818    |
| 10                | Lewy      | 0.00200 | 0.00221 | 0.12940 | 0.00000 | 0.00354 | -2.69929    | -2.65529    | -0.88807    |             | -2.45156    |
| 11                | Lewy      | 0.00394 | 0.00839 | 0.34575 |         | 0.00390 | -2.40420    | -2.07642    | -0.46124    |             | -2.40856    |
| 12                | Lewy      | 0.01296 | 0.00467 | 0.46139 | 0.00261 | 0.02307 | -1.88725    | -2.33099    | -0.33593    | -2.58349    | -1.63702    |
| 13                | Lewy      | 0.01156 | 0.00828 | 0.22139 | 0.00096 | 0.01899 | -1.93709    | -2.08187    | -0.65484    | -3.01775    | -1.72146    |
| 14                | Lewy      | 0.01195 | 0.29658 | 0.20192 | 0.00579 | 0.04042 | -1.92252    | -0.52786    | -0.69481    | -2.23741    | -1.39344    |
| 15                | Lewy      | 0.00486 | 0.18514 | 0.11315 | 0.00442 | 0.03419 | -2.31358    | -0.73251    | -0.94636    | -2.35487    | -1.46605    |
| 16                | Lewy      | 0.01765 | 0.08225 | 0.11015 | 0.00392 | 0.00536 | -1.75333    | -1.08487    | -0.95801    | -2.40654    | -2.27107    |
| 17                | Lewy      |         | 0.02012 | 0.16599 | 0.00392 | 0.00774 |             | -1.69641    | -0.77992    | -2.40654    | -2.11137    |
| 18                | Lewy      |         | 0.07633 | 0.35178 | 0.00261 | 0.00655 |             | -1.11730    | -0.45373    | -2.58263    | -2.18392    |
| 19                | Lewy      |         | 0.03964 | 0.41523 | 0.01373 | 0.00119 |             | -1.40181    | -0.38171    | -1.86247    | -2.92428    |
| 20                | Lewy      |         | 0.17101 | 0.33249 | 0.00392 | 0.00357 |             | -0.76699    | -0.47822    | -2.40654    | -2.44716    |
| 21                | Lewy      | 0.00635 | 0.10917 | 0.01336 | 0.00210 | 0.00422 | -2.19717    | -0.96191    | -1.87410    | -2.67731    | -2.37500    |
| 22                | Lewy      | 0.00000 | 0.00187 | 0.00000 | 0.00000 | 0.00869 |             | -2.72747    |             |             | -2.06095    |
| 23                | Lewy      | 0.00109 | 0.02845 | 0.24586 |         | 0.00138 | -2.96267    | -1.54597    | -0.60932    |             | -2.85985    |
| 24                | Lewy      | 0.00066 | 0.00925 | 0.35158 |         | 0.00350 | -3.18294    | -2.03396    | -0.45397    |             | -2.45649    |
| 25                | Lewy      |         | 0.01000 | 0.30965 |         | 0.00414 |             | -1.99998    | -0.50913    |             | -2.38298    |
| 26                | Lewy      |         | 0.02196 | 0.23981 |         | 0.00268 |             | -1.65830    | -0.62014    |             | -2.57112    |
| 27                | Lewy      | 0.00471 | 0.00828 | 0.24112 | 0.00261 | 0.00952 | -2.32736    | -2.08176    | -0.61777    |             | -2.02119    |
| 28                | Lewy      | 0.00358 | 0.00771 | 0.05376 | 0.00212 | 0.00202 | -2.44660    | -2.11268    | -1.26951    |             | -2.69425    |
| MEAN              | Lewy      | 0.02458 | 0.04506 | 0.21220 | 0.00305 | 0.01016 | -2.24784    | -1.70096    | -0.79365    | -2.47619    | -2.21406    |
| SEM               | Lewy      | 0.01654 | 0.01303 | 0.02540 | 0.00064 | 0.00286 | 0.16198     | 0.11118     | 0.08676     | 0.07517     | 0.09132     |
| N                 | Lewy      | 21      | 28      | 28      | 22      | 26      | 18          | 27          | 27          | 14          | 24          |
| Lewy % of Control |           | 22.1%   | 2.1%    | 81.4%   | 2.2%    | 21.9%   |             |             |             |             |             |
| p Lewy vs Control |           |         |         |         |         |         | 5.3E-07     | 2.7E-21     | 0.44874     | 8.9E-12     | 0.00021     |





| HEART               | PD/CON | Cys-DA         | Log DHPG       | Log NE         | Log DOPA       | Log EPI        | Log Cys_DOPA   | Log DOPET      |
|---------------------|--------|----------------|----------------|----------------|----------------|----------------|----------------|----------------|
|                     |        | <i>pmol/mg</i> |
| 1                   | CON    | 0.01486        | -1.76699       | 0.23415        | -0.64527       | -0.94203       |                | -2.66657       |
| 2                   | CON    | 0.00120        | -1.34272       | 0.23095        | -0.39801       |                |                | -2.79598       |
| 3                   | CON    | 0.00000        | -1.57724       | 0.32063        | -0.63455       | -1.36482       | -1.93149       | -2.58546       |
| 4                   | CON    | 0.00508        |                | 0.10757        | 0.15563        | -1.31797       | -0.85722       |                |
| 5                   | CON    | 0.00000        | -1.51445       | 0.24487        | -0.59898       | -1.00718       | -1.76729       |                |
| 6                   | CON    | 0.00631        | -1.20259       | 0.49906        | -0.93400       | -0.81890       | -2.21251       | -1.88601       |
| 7                   | CON    | 0.00000        | -1.46554       | 0.16352        | -0.97014       | -1.51379       | -2.48868       | -2.32080       |
| 8                   | CON    | 0.00501        | -1.51982       | 0.62660        | -1.03657       | -1.96678       | -2.58758       | -2.01334       |
| 9                   | CON    | 0.00136        | -1.62137       | 0.08288        | -1.04113       | -1.53489       |                | -2.70064       |
| 10                  | CON    | 0.00379        | -1.26676       | 0.62155        | -0.80098       | -1.85824       |                | -2.33440       |
| 11                  | CON    | 0.00766        | -1.72028       | -0.25034       | -0.93083       | -1.36113       | -2.15821       | -1.66552       |
|                     |        |                |                |                |                |                |                |                |
| MEAN                |        | 0.00411        | -1.49978       | 0.26195        | -0.71226       | -1.36857       | -2.00043       | -2.32986       |
| SEM                 |        | 0.00135        | 0.05868        | 0.07699        | 0.10703        | 0.11849        | 0.21925        | 0.13292        |
| N                   |        | 11             | 10             | 11             | 11             | 10             | 7              | 9              |
| MAX                 |        | 0.01486        | -1.20259       | 0.62660        | 0.15563        | -0.81890       | -0.85722       | -1.66552       |
| QUARTILE 3          |        | 0.00569        | -1.37342       | 0.40984        | -0.61677       | -1.08488       | -1.84939       | -2.01334       |
| MEDIAN              |        | 0.00379        | -1.51713       | 0.23415        | -0.80098       | -1.36297       | -2.15821       | -2.33440       |
| QUARTILE 1          |        | 0.00060        | -1.61034       | 0.13555        | -0.95207       | -1.52962       | -2.35060       | -2.66657       |
| MIN                 |        | 0.00000        | -1.76699       | -0.25034       | -1.04113       | -1.96678       | -2.58758       | -2.79598       |
|                     |        |                |                |                |                |                |                |                |
| HEART               | PD/CON | Cys-DA         | Log DHPG       | Log NE         | Log DOPA       | Log EPI        | Log Cys_DOPA   | Log DOPET      |
|                     |        | <i>pmol/mg</i> |
| 1                   | PD     | 0.00000        |                | -1.65830       | -0.62014       | -2.58679       | -1.54317       |                |
| 2                   | PD     | 0.00000        | -2.77762       | -1.86137       | -0.80666       | -2.76648       | -1.53406       |                |
| 3                   | PD     | 0.00000        | -3.18294       | -2.03396       | -0.45397       | -2.62952       | -1.28338       |                |
| 4                   | PD     | 0.00000        | -2.32736       | -2.08176       | -0.61777       | -2.14851       | -1.30379       |                |
| 5                   | PD     | 0.00000        |                | -1.07560       | -0.09007       | -2.41735       | -1.24441       |                |
| 6                   | PD     | 0.00000        | -2.44660       | -2.11268       | -1.26951       | -2.36568       | -1.76805       |                |
| 7                   | PD     | 0.00000        |                | -1.73395       | 0.27189        | -1.32761       | -1.64914       |                |
| 8                   | PD     | 0.00000        | -2.96267       | -1.54597       | -0.60932       | -2.30836       | -1.42643       |                |
| 9                   | PD     | 0.00000        |                | -1.99998       | -0.50913       | -2.71344       | -1.58869       |                |
| 10                  | PD     | 0.00000        | -2.54155       | -1.46317       | -0.48007       | -2.20790       | -1.58432       |                |
| 11                  | PD     | 0.00000        | -2.10707       | -1.57596       | -0.57912       | -2.02948       | -1.58308       |                |
|                     |        |                |                |                |                |                |                |                |
| MEAN                |        | 0.00000        | -2.62083       | -1.74024       | -0.52399       | -2.31828       | -1.50077       | #DIV/0!        |
| SEM                 |        | 0.00000        | 0.14177        | 0.09600        | 0.11650        | 0.12225        | 0.05001        | #DIV/0!        |
| N                   |        | 11             | 7              | 11             | 11             | 11             | 11             | 0              |
| MAX                 |        | 0.00000        | -2.10707       | -1.07560       | 0.27189        | -1.32761       | -1.24441       | 0.00000        |
| QUARTILE 3          |        | 0.00000        | -2.38698       | -1.56096       | -0.46702       | -2.17820       | -1.36511       | #NUM!          |
| MEDIAN              |        | 0.00000        | -2.54155       | -1.73395       | -0.57912       | -2.36568       | -1.54317       | #NUM!          |
| QUARTILE 1          |        | 0.00000        | -2.87014       | -2.01697       | -0.61896       | -2.60815       | -1.58651       | #NUM!          |
| MIN                 |        | 0.00000        | -3.18294       | -2.11268       | -1.26951       | -2.76648       | -1.76805       | 0.00000        |
| <i>PD % of CON</i>  |        | <i>0.0%</i>    |                |                |                |                |                |                |
| <i>p PD vs. CON</i> |        |                | <i>6.3E-07</i> | <i>5.3E-13</i> | <i>0.24794</i> | <i>0.00002</i> | <i>0.01486</i> | <i>#DIV/0!</i> |

| HEART        | PD/CON | Log DA         | Log DOPAC      | Log Cys-DA     | DHPG/NE | Log DHPG/NE | DA/NE   | Log DA/NE |
|--------------|--------|----------------|----------------|----------------|---------|-------------|---------|-----------|
|              |        | <i>pmol/mg</i> | <i>pmol/mg</i> | <i>pmol/mg</i> |         |             |         |           |
| 1            | CON    | -0.90437       | -1.43857       | -1.82812       | 0.00997 | -2.00114    | 0.07269 | -1.13852  |
| 2            | CON    | -1.01186       | -1.54111       | -2.92119       | 0.02669 | -1.57367    | 0.05717 | -1.24281  |
| 3            | CON    | -0.92462       | -2.27107       |                | 0.01265 | -1.89786    | 0.05685 | -1.24525  |
| 4            | CON    | -1.17185       | -2.22531       | -2.29430       | 0.00000 |             | 0.05255 | -1.27943  |
| 5            | CON    | -1.57191       | -2.18392       |                | 0.01741 | -1.75932    | 0.01525 | -1.81678  |
| 6            | CON    | -0.23160       | -1.07175       | -2.19997       | 0.01988 | -1.70166    | 0.18592 | -0.73067  |
| 7            | CON    | -0.94384       | -1.97171       |                | 0.02349 | -1.62907    | 0.07810 | -1.10736  |
| 8            | CON    | -0.19008       | -1.43528       | -2.30045       | 0.00714 | -2.14643    | 0.15252 | -0.81668  |
| 9            | CON    | -0.94601       | -1.69403       | -2.86597       | 0.01976 | -1.70425    | 0.09356 | -1.02889  |
| 10           | CON    | -0.52312       | -1.38162       | -2.42181       | 0.01293 | -1.88831    | 0.07167 | -1.14466  |
| 11           | CON    | -0.32473       | -0.92771       | -2.11581       | 0.03389 | -1.46995    | 0.84257 | -0.07439  |
|              |        |                |                |                |         |             |         |           |
| MEAN         |        | -0.79491       | -1.64928       | -2.36845       | 0.01671 | -1.77716    | 0.15262 | -1.05686  |
| SEM          |        | 0.12950        | 0.13941        | 0.13026        | 0.00287 | 0.06519     | 0.07047 | 0.12948   |
| N            |        | 11             | 11             | 8              | 11      | 10          | 11      | 11        |
| MAX          |        | -0.19008       | -0.92771       | -1.82812       | 0.03389 | -1.46995    | 0.84257 | -0.07439  |
| QUARTILE 3   |        | -0.42393       | -1.40845       | -2.17893       | 0.02168 | -1.64721    | 0.12304 | -0.92279  |
| MEDIAN       |        | -0.92462       | -1.54111       | -2.29737       | 0.01741 | -1.73178    | 0.07269 | -1.13852  |
| QUARTILE 1   |        | -0.97894       | -2.07781       | -2.53285       | 0.01131 | -1.89547    | 0.05701 | -1.24403  |
| MIN          |        | -1.57191       | -2.27107       | -2.92119       | 0.00000 | -2.14643    | 0.01525 | -1.81678  |
|              |        |                |                |                |         |             |         |           |
| HEART        | PD/CON | Log DA         | Log DOPAC      | Log Cys-DA     | DHPG/NE | Log DHPG/NE | DA/NE   | Log DA/NE |
|              |        | <i>pmol/mg</i> | <i>pmol/mg</i> | <i>pmol/mg</i> |         |             |         |           |
| 1            | PD     |                | -2.57112       |                | 0.00000 |             | 0.00000 |           |
| 2            | PD     |                | -2.24450       |                | 0.12127 | -0.91625    | 0.00000 |           |
| 3            | PD     |                | -2.45649       |                | 0.07096 | -1.14898    |         |           |
| 4            | PD     | -2.58263       | -2.02119       |                | 0.56807 | -0.24560    | 0.31559 | -0.50087  |
| 5            | PD     | -1.61649       | -2.44716       |                | 0.00000 |             | 0.28781 | -0.54089  |
| 6            | PD     | -2.67332       | -2.69425       |                | 0.46353 | -0.33392    | 0.27501 | -0.56064  |
| 7            | PD     |                | -2.75909       |                | 0.00000 |             | 0.00000 |           |
| 8            | PD     |                | -2.85985       |                | 0.03831 | -1.41670    |         |           |
| 9            | PD     |                | -2.38298       |                |         |             |         |           |
| 10           | PD     | -2.34185       | -1.89971       |                | 0.08349 | -1.07838    | 0.13223 | -0.87868  |
| 11           | PD     | -2.66355       | -1.98743       |                | 0.29437 | -0.53111    | 0.08173 | -1.08760  |
|              |        |                |                |                |         |             |         |           |
| MEAN         |        | -2.37557       | -2.39307       | #DIV/0!        | 0.16400 | -0.81014    | 0.13655 | -0.71374  |
| SEM          |        | 0.19897        | 0.09768        | #DIV/0!        | 0.06527 | 0.16828     | 0.04875 | 0.11524   |
| N            |        | 5              | 11             | 0              | 10      | 7           | 8       | 5         |
| MAX          |        | -1.61649       | -1.89971       | 0.00000        | 0.56807 | -0.24560    | 0.31559 | -0.50087  |
| QUARTILE 3   |        | -2.34185       | -2.13284       | #NUM!          | 0.25109 | -0.43252    | 0.27821 | -0.54089  |
| MEDIAN       |        | -2.58263       | -2.44716       | #NUM!          | 0.07722 | -0.91625    | 0.10698 | -0.56064  |
| QUARTILE 1   |        | -2.66355       | -2.63268       | #NUM!          | 0.00958 | -1.11368    | 0.00000 | -0.87868  |
| MIN          |        | -2.67332       | -2.85985       | 0.00000        | 0.00000 | -1.41670    | 0.00000 | -1.08760  |
| PD % of CON  |        |                |                |                | 981.5%  |             | 89.5%   |           |
| p PD vs. CON |        | 0.00001        | 0.00030        | #DIV/0!        |         | 0.00002     |         | 0.12353   |

| HEART        | PD/CON | DOPAC/DHPG | Log DOPAC/DHPG | DOPAC/NE | Log DOPAC/NE | DOPAC/DA |
|--------------|--------|------------|----------------|----------|--------------|----------|
| 1            | CON    | 2.13022    | 0.32842        | 0.02125  | -1.67272     | 0.29229  |
| 2            | CON    | 0.63329    | -0.19840       | 0.01690  | -1.77206     | 0.29563  |
| 3            | CON    | 0.20238    | -0.69383       | 0.00256  | -2.59169     | 0.04504  |
| 4            | CON    |            |                | 0.00465  | -2.33288     | 0.08842  |
| 5            | CON    | 0.21406    | -0.66947       | 0.00373  | -2.42879     | 0.24434  |
| 6            | CON    | 1.35159    | 0.13085        | 0.02687  | -1.57081     | 0.14450  |
| 7            | CON    | 0.31177    | -0.50616       | 0.00732  | -2.13523     | 0.09379  |
| 8            | CON    | 1.21492    | 0.08455        | 0.00867  | -2.06188     | 0.05686  |
| 9            | CON    | 0.84594    | -0.07266       | 0.01671  | -1.77691     | 0.17864  |
| 10           | CON    | 0.76761    | -0.11486       | 0.00993  | -2.00317     | 0.13851  |
| 11           | CON    | 6.20263    | 0.79258        | 0.21020  | -0.67737     | 0.24947  |
|              |        |            |                |          |              |          |
| MEAN         |        | 1.38744    | -0.09190       | 0.02989  | -1.91123     | 0.16613  |
| SEM          |        | 0.56719    | 0.14604        | 0.01818  | 0.15732      | 0.02780  |
| N            |        | 10         | 10             | 11       | 11           | 11       |
| MAX          |        | 6.20263    | 0.79258        | 0.21020  | -0.67737     | 0.29563  |
| QUARTILE 3   |        | 1.31742    | 0.11927        | 0.01907  | -1.72239     | 0.24691  |
| MEDIAN       |        | 0.80678    | -0.09376       | 0.00993  | -2.00317     | 0.14450  |
| QUARTILE 1   |        | 0.39215    | -0.42922       | 0.00599  | -2.23405     | 0.09110  |
| MIN          |        | 0.20238    | -0.69383       | 0.00256  | -2.59169     | 0.04504  |
|              |        |            |                |          |              |          |
| HEART        | PD/CON | DOPAC/DHPG | Log DOPAC/DHPG | DOPAC/NE | Log DOPAC/NE | DOPAC/DA |
| 1            | PD     |            |                | 0.12223  | -0.91282     |          |
| 2            | PD     | 3.41288    | 0.53312        | 0.41388  | -0.38312     |          |
| 3            | PD     | 5.32671    | 0.72646        | 0.37799  | -0.42253     |          |
| 4            | PD     | 2.02381    | 0.30617        | 1.14966  | 0.06057      | 3.64286  |
| 5            | PD     |            |                | 0.04251  | -1.37156     | 0.14768  |
| 6            | PD     | 0.56539    | -0.24765       | 0.26208  | -0.58157     | 0.95296  |
| 7            | PD     |            |                | 0.09437  | -1.02515     |          |
| 8            | PD     | 1.26714    | 0.10282        | 0.04854  | -1.31388     |          |
| 9            | PD     |            |                | 0.41400  | -0.38300     |          |
| 10           | PD     | 4.38367    | 0.64184        | 0.36598  | -0.43654     | 2.76781  |
| 11           | PD     | 1.31717    | 0.11964        | 0.38773  | -0.41147     | 4.74382  |
|              |        |            |                |          |              |          |
| MEAN         |        | 2.61382    | 0.31177        | 0.33445  | -0.65283     | 2.45103  |
| SEM          |        | 0.67559    | 0.13125        | 0.09331  | 0.13408      | 0.84638  |
| N            |        | 7          | 7              | 11       | 11           | 5        |
| MAX          |        | 5.32671    | 0.72646        | 1.14966  | 0.06057      | 4.74382  |
| QUARTILE 3   |        | 3.89827    | 0.58748        | 0.40081  | -0.39730     | 3.64286  |
| MEDIAN       |        | 2.02381    | 0.30617        | 0.36598  | -0.43654     | 2.76781  |
| QUARTILE 1   |        | 1.29215    | 0.11123        | 0.10830  | -0.96899     | 0.95296  |
| MIN          |        | 0.56539    | -0.24765       | 0.04251  | -1.37156     | 0.14768  |
| PD % of CON  |        | 188.4%     |                | 1119.0%  |              | 1475.3%  |
| p PD vs. CON |        |            | 0.06994        |          | 6.0E-06      |          |

| HEART        | PD/CON | Log DOPAC/DA | DOPET/DOPAC | Log DOPET/DOPAC | Cys-DA/DA | Log Cys-DA/DA |
|--------------|--------|--------------|-------------|-----------------|-----------|---------------|
| 1            | CON    | -0.53419     | 0.05916     | -1.22800        | 0.11919   | -0.92375      |
| 2            | CON    | -0.52925     | 0.05561     | -1.25487        | 0.01232   | -1.90933      |
| 3            | CON    | -1.34645     | 0.48485     | -0.31439        |           |               |
| 4            | CON    | -1.05346     | 0.00000     |                 | 0.07543   | -1.12244      |
| 5            | CON    | -0.61201     | 0.00000     |                 |           |               |
| 6            | CON    | -0.84015     | 0.15337     | -0.81427        | 0.01076   | -1.96836      |
| 7            | CON    | -1.02787     | 0.44762     | -0.34909        |           |               |
| 8            | CON    | -1.24520     | 0.26420     | -0.57806        | 0.00776   | -2.11037      |
| 9            | CON    | -0.74802     | 0.09849     | -1.00661        | 0.01202   | -1.91995      |
| 10           | CON    | -0.85851     | 0.11149     | -0.95277        | 0.01263   | -1.89869      |
| 11           | CON    | -0.60297     | 0.18289     | -0.73781        | 0.01618   | -1.79108      |
|              |        |              |             |                 |           |               |
| MEAN         |        | -0.85437     | 0.16888     | -0.80399        | 0.03329   | -1.70550      |
| SEM          |        | 0.08562      | 0.05020     | 0.11477         | 0.01459   | 0.15331       |
| N            |        | 11           | 11          | 9               | 8         | 8             |
| MAX          |        | -0.52925     | 0.48485     | -0.31439        | 0.11919   | -0.92375      |
| QUARTILE 3   |        | -0.60749     | 0.22355     | -0.57806        | 0.03099   | -1.62392      |
| MEDIAN       |        | -0.84015     | 0.11149     | -0.81427        | 0.01247   | -1.90401      |
| QUARTILE 1   |        | -1.04066     | 0.05738     | -1.00661        | 0.01171   | -1.93206      |
| MIN          |        | -1.34645     | 0.00000     | -1.25487        | 0.00776   | -2.11037      |
|              |        |              |             |                 |           |               |
| HEART        | PD/CON | Log DOPAC/DA | DOPET/DOPAC | Log DOPET/DOPAC | Cys-DA/DA | Log Cys-DA/DA |
| 1            | PD     |              | 0.00000     |                 |           |               |
| 2            | PD     |              | 0.00000     |                 |           |               |
| 3            | PD     |              | 0.00000     |                 |           |               |
| 4            | PD     | 0.56144      | 0.00000     |                 | 0.00000   |               |
| 5            | PD     | -0.83067     | 0.00000     |                 | 0.00000   |               |
| 6            | PD     | -0.02093     | 0.00000     |                 | 0.00000   |               |
| 7            | PD     |              | 0.00000     |                 |           |               |
| 8            | PD     |              | 0.00000     |                 |           |               |
| 9            | PD     |              | 0.00000     |                 |           |               |
| 10           | PD     | 0.44214      | 0.00000     |                 | 0.00000   |               |
| 11           | PD     | 0.67613      | 0.00000     |                 | 0.00000   |               |
|              |        |              |             |                 |           |               |
| MEAN         |        | 0.16562      | 0.00000     | #DIV/0!         | 0.00000   | #DIV/0!       |
| SEM          |        | 0.27578      | 0.00000     | #DIV/0!         | 0.00000   | #DIV/0!       |
| N            |        | 5            | 11          | 0               | 5         | 0             |
| MAX          |        | 0.67613      | 0.00000     | 0.00000         | 0.00000   | 0.00000       |
| QUARTILE 3   |        | 0.56144      | 0.00000     | #NUM!           | 0.00000   | #NUM!         |
| MEDIAN       |        | 0.44214      | 0.00000     | #NUM!           | 0.00000   | #NUM!         |
| QUARTILE 1   |        | -0.02093     | 0.00000     | #NUM!           | 0.00000   | #NUM!         |
| MIN          |        | -0.83067     | 0.00000     | 0.00000         | 0.00000   | 0.00000       |
| PD % of CON  |        |              | 0.0%        |                 | 0.0%      |               |
| p PD vs. CON |        | 0.00038      |             | #DIV/0!         |           | #DIV/0!       |

| HEART        | PD/CON | Cys-DOPA/DOPA | Log Cys-DOPA/DOPA | Cys-DOPA/Cys-DA | Log Cys-DOPA/Cys-DA |
|--------------|--------|---------------|-------------------|-----------------|---------------------|
| 1            | CON    | 0.15900       | -0.79861          | 2.42237         | 0.38424             |
| 2            | CON    | 0.05659       | -1.24724          | 18.87747        | 1.27594             |
| 3            | CON    | 0.05047       | -1.29694          |                 |                     |
| 4            | CON    | 0.09708       | -1.01285          | 27.35735        | 1.43707             |
| 5            | CON    | 0.06787       | -1.16831          |                 |                     |
| 6            | CON    | 0.05266       | -1.27851          | 0.97153         | -0.01254            |
| 7            | CON    | 0.03030       | -1.51854          |                 |                     |
| 8            | CON    | 0.02812       | -1.55101          | 0.51627         | -0.28712            |
| 9            | CON    | 0.26673       | -0.57393          | 17.82004        | 1.25091             |
| 10           | CON    | 0.05255       | -1.27940          | 2.19495         | 0.34142             |
| 11           | CON    | 0.05924       | -1.22739          | 0.90698         | -0.04240            |
|              |        |               |                   |                 |                     |
| MEAN         |        | 0.08369       | -1.17752          | 8.88337         | 0.54344             |
| SEM          |        | 0.02130       | 0.08702           | 3.78847         | 0.24068             |
| N            |        | 11            | 11                | 8               | 8                   |
| MAX          |        | 0.26673       | -0.57393          | 27.35735        | 1.43707             |
| QUARTILE 3   |        | 0.08248       | -1.09058          | 18.08440        | 1.25717             |
| MEDIAN       |        | 0.05659       | -1.24724          | 2.30866         | 0.36283             |
| QUARTILE 1   |        | 0.05151       | -1.28817          | 0.95539         | -0.02001            |
| MIN          |        | 0.02812       | -1.55101          | 0.51627         | -0.28712            |
|              |        |               |                   |                 |                     |
| HEART        | PD/CON | Cys-DOPA/DOPA | Log Cys-DOPA/DOPA | Cys-DOPA/Cys-DA | Log Cys-DOPA/Cys-DA |
| 1            | PD     | 0.11939       | -0.92302          |                 |                     |
| 2            | PD     | 0.18733       | -0.72740          |                 |                     |
| 3            | PD     | 0.14811       | -0.82941          |                 |                     |
| 4            | PD     | 0.20606       | -0.68601          |                 |                     |
| 5            | PD     | 0.07009       | -1.15434          |                 |                     |
| 6            | PD     | 0.31729       | -0.49854          |                 |                     |
| 7            | PD     | 0.01199       | -1.92103          |                 |                     |
| 8            | PD     | 0.15237       | -0.81711          |                 |                     |
| 9            | PD     | 0.08326       | -1.07956          |                 |                     |
| 10           | PD     | 0.07866       | -1.10425          |                 |                     |
| 11           | PD     | 0.09909       | -1.00396          |                 |                     |
|              |        |               |                   |                 |                     |
| MEAN         |        | 0.13397       | -0.97678          | #DIV/0!         | #DIV/0!             |
| SEM          |        | 0.02490       | 0.11185           | #DIV/0!         | #DIV/0!             |
| N            |        | 11            | 11                | 0               | 0                   |
| MAX          |        | 0.31729       | -0.49854          | 0.00000         | 0.00000             |
| QUARTILE 3   |        | 0.16985       | -0.77226          | #NUM!           | #NUM!               |
| MEDIAN       |        | 0.11939       | -0.92302          | #NUM!           | #NUM!               |
| QUARTILE 1   |        | 0.08096       | -1.09190          | #NUM!           | #NUM!               |
| MIN          |        | 0.01199       | -1.92103          | 0.00000         | 0.00000             |
| PD % of CON  |        | 160.1%        |                   | #DIV/0!         |                     |
| p PD vs. CON |        |               | 0.17204           |                 | #DIV/0!             |

| HEART        | PD/CON | DOPA/DOPAC | Log DOPA/DOPAC | Cys-DOPA/DOPAC | Log Cys-DOPA/DOPAC |
|--------------|--------|------------|----------------|----------------|--------------------|
| 1            | CON    | 6.21293    | 0.79330        | 0.98783        | -0.00532           |
| 2            | CON    | 13.90280   | 1.14310        | 0.78679        | -0.10414           |
| 3            | CON    | 43.30288   | 1.63652        | 2.18565        | 0.33958            |
| 4            | CON    | 240.40203  | 2.38094        | 23.33924       | 1.36809            |
| 5            | CON    | 38.45316   | 1.58493        | 2.60990        | 0.41662            |
| 6            | CON    | 1.37324    | 0.13775        | 0.07232        | -1.14076           |
| 7            | CON    | 10.03611   | 1.00157        | 0.30411        | -0.51698           |
| 8            | CON    | 2.50442    | 0.39871        | 0.07042        | -1.15230           |
| 9            | CON    | 4.49678    | 0.65290        | 1.19943        | 0.07897            |
| 10           | CON    | 3.80751    | 0.58064        | 0.20010        | -0.69876           |
| 11           | CON    | 0.99285    | -0.00312       | 0.05882        | -1.23051           |
|              |        |            |                |                |                    |
| MEAN         |        | 33.22588   | 0.93702        | 2.89224        | -0.24050           |
| SEM          |        | 21.18744   | 0.21493        | 2.06149        | 0.24197            |
| N            |        | 11         | 11             | 11             | 11                 |
| MAX          |        | 240.40203  | 2.38094        | 23.33924       | 1.36809            |
| QUARTILE 3   |        | 26.17798   | 1.36402        | 1.69254        | 0.20928            |
| MEDIAN       |        | 6.21293    | 0.79330        | 0.78679        | -0.10414           |
| QUARTILE 1   |        | 3.15597    | 0.48967        | 0.13621        | -0.91976           |
| MIN          |        | 0.99285    | -0.00312       | 0.05882        | -1.23051           |
|              |        |            |                |                |                    |
| HEART        | PD/CON | DOPA/DOPAC | Log DOPA/DOPAC | Cys-DOPA/DOPAC | Log Cys-DOPA/DOPAC |
| 1            | PD     | 89.32687   | 1.95098        | 10.66493       | 1.02796            |
| 2            | PD     | 27.40564   | 1.43784        | 5.13383        | 0.71044            |
| 3            | PD     | 100.58081  | 2.00252        | 14.89737       | 1.17311            |
| 4            | PD     | 25.31726   | 1.40342        | 5.21677        | 0.71740            |
| 5            | PD     | 227.55330  | 2.35708        | 15.94937       | 1.20274            |
| 6            | PD     | 26.59086   | 1.42473        | 8.43714        | 0.92620            |
| 7            | PD     | 1073.95444 | 3.03099        | 12.88113       | 1.10995            |
| 8            | PD     | 178.04510  | 2.25053        | 27.12787       | 1.43342            |
| 9            | PD     | 74.79061   | 1.87385        | 6.22714        | 0.79429            |
| 10           | PD     | 26.28087   | 1.41964        | 2.06724        | 0.31539            |
| 11           | PD     | 25.60367   | 1.40830        | 2.53715        | 0.40435            |
|              |        |            |                |                |                    |
| MEAN         |        | 170.49540  | 1.86908        | 10.10363       | 0.89230            |
| SEM          |        | 92.64978   | 0.15877        | 2.22226        | 0.10354            |
| N            |        | 11         | 11             | 11             | 11                 |
| MAX          |        | 1073.95444 | 3.03099        | 27.12787       | 1.43342            |
| QUARTILE 3   |        | 139.31296  | 2.12652        | 13.88925       | 1.14153            |
| MEDIAN       |        | 74.79061   | 1.87385        | 8.43714        | 0.92620            |
| QUARTILE 1   |        | 26.43587   | 1.42219        | 5.17530        | 0.71392            |
| MIN          |        | 25.31726   | 1.40342        | 2.06724        | 0.31539            |
| PD % of CON  |        | 513.1%     |                | 349.3%         |                    |
| p PD vs. CON |        |            | 0.00232        |                | 0.00035            |

| HEART               | PD/CON | (DOPA+Cys-DOPA)/DOPAC | Log (DOPA+Cys-DOPA)/DOPAC |
|---------------------|--------|-----------------------|---------------------------|
| 1                   | CON    | 7.2                   | 0.857                     |
| 2                   | CON    | 14.7                  | 1.167                     |
| 3                   | CON    | 45.5                  | 1.658                     |
| 4                   | CON    | 263.7                 | 2.421                     |
| 5                   | CON    | 41.1                  | 1.613                     |
| 6                   | CON    | 1.4                   | 0.160                     |
| 7                   | CON    | 10.3                  | 1.015                     |
| 8                   | CON    | 2.6                   | 0.411                     |
| 9                   | CON    | 5.7                   | 0.756                     |
| 10                  | CON    | 4.0                   | 0.603                     |
| 11                  | CON    | 1.1                   | 0.022                     |
|                     |        |                       |                           |
| <b>MEAN</b>         |        | <b>36.1</b>           | <b>0.971</b>              |
| <b>SEM</b>          |        | <b>23.2</b>           | <b>0.215</b>              |
| <b>N</b>            |        | <b>11</b>             | <b>11</b>                 |
| <b>MAX</b>          |        | <b>263.7</b>          | <b>2.421</b>              |
| <b>QUARTILE 3</b>   |        | <b>27.9</b>           | <b>1.390</b>              |
| <b>MEDIAN</b>       |        | <b>7.2</b>            | <b>0.857</b>              |
| <b>QUARTILE 1</b>   |        | <b>3.3</b>            | <b>0.507</b>              |
| <b>MIN</b>          |        | <b>1.1</b>            | <b>0.022</b>              |
|                     |        | <i>100.0%</i>         |                           |
| HEART               | PD/CON | (DOPA+Cys-DOPA)/DOPAC | Log (DOPA+Cys-DOPA)/DOPAC |
| 1                   | PD     | 100.0                 | 1.99996                   |
| 2                   | PD     | 32.5                  | 1.51241                   |
| 3                   | PD     | 115.5                 | 2.06250                   |
| 4                   | PD     | 30.5                  | 1.48478                   |
| 5                   | PD     | 243.5                 | 2.38650                   |
| 6                   | PD     | 35.0                  | 1.54442                   |
| 7                   | PD     | 1086.8                | 3.03616                   |
| 8                   | PD     | 205.2                 | 2.31212                   |
| 9                   | PD     | 81.0                  | 1.90858                   |
| 10                  | PD     | 28.3                  | 1.45252                   |
| 11                  | PD     | 28.1                  | 1.44934                   |
|                     |        |                       |                           |
| <b>MEAN</b>         |        | <b>180.6</b>          | <b>1.923</b>              |
| <b>SEM</b>          |        | <b>93.3</b>           | <b>0.153</b>              |
| <b>N</b>            |        | <b>11</b>             | <b>11</b>                 |
| <b>MAX</b>          |        | <b>1086.8</b>         | <b>3.036</b>              |
| <b>QUARTILE 3</b>   |        | <b>160.3</b>          | <b>2.187</b>              |
| <b>MEDIAN</b>       |        | <b>81.0</b>           | <b>1.909</b>              |
| <b>QUARTILE 1</b>   |        | <b>31.5</b>           | <b>1.499</b>              |
| <b>MIN</b>          |        | <b>28.1</b>           | <b>1.449</b>              |
| <i>PD % of CON</i>  |        | <i>500.0%</i>         |                           |
| <i>p PD vs. CON</i> |        |                       | <i>0.00178</i>            |

| HEART        | PD/CON | TH                                              | Log TH   | DOPA/DA   | Log DOPA/DA |
|--------------|--------|-------------------------------------------------|----------|-----------|-------------|
|              |        | <i>(DOPA +Cys-DOPA adjusted for dec. LAAAD)</i> |          |           |             |
| 1            | CON    | 0.26231                                         | -0.58119 | 1.81595   | 0.25910     |
| 2            | CON    | 0.42257                                         | -0.37410 | 4.11012   | 0.61385     |
| 3            | CON    | 0.24369                                         | -0.61316 | 1.95016   | 0.29007     |
| 4            | CON    | 1.56989                                         | 0.19587  | 21.25607  | 1.32748     |
| 5            | CON    | 0.26887                                         | -0.57047 | 9.39557   | 0.97292     |
| 6            | CON    | 0.12254                                         | -0.91171 | 0.19843   | -0.70240    |
| 7            | CON    | 0.11036                                         | -0.95718 | 0.94124   | -0.02630    |
| 8            | CON    | 0.09451                                         | -1.02453 | 0.14240   | -0.84649    |
| 9            | CON    | 0.11523                                         | -0.93845 | 0.80331   | -0.09512    |
| 10           | CON    | 0.16644                                         | -0.77874 | 0.52739   | -0.27786    |
| 11           | CON    | 0.12421                                         | -0.90583 | 0.24769   | -0.60609    |
|              |        |                                                 |          |           |             |
| MEAN         |        | 0.31824                                         | -0.67813 | 3.76258   | 0.08265     |
| SEM          |        | 0.12870                                         | 0.10718  | 1.93131   | 0.20946     |
| N            |        | 11                                              | 11       | 11        | 11          |
| MAX          |        | 1.56989                                         | 0.19587  | 21.25607  | 1.32748     |
| QUARTILE 3   |        | 0.26559                                         | -0.57583 | 3.03014   | 0.45196     |
| MEDIAN       |        | 0.16644                                         | -0.77874 | 0.94124   | -0.02630    |
| QUARTILE 1   |        | 0.11888                                         | -0.92508 | 0.38754   | -0.44198    |
| MIN          |        | 0.09451                                         | -1.02453 | 0.14240   | -0.84649    |
|              |        |                                                 |          |           |             |
| HEART        | PD/CON | TH                                              | Log TH   | DOPA/DA   | Log DOPA/DA |
|              |        | <i>(DOPA +Cys-DOPA adjusted for dec. LAAAD)</i> |          |           |             |
| 1            | PD     | 0.05368                                         | -1.27015 |           |             |
| 2            | PD     | 0.03706                                         | -1.43108 |           |             |
| 3            | PD     | 0.08073                                         | -1.09298 |           |             |
| 4            | PD     | 0.05816                                         | -1.23540 | 92.22716  | 1.96486     |
| 5            | PD     | 0.17392                                         | -0.75964 | 33.60584  | 1.52641     |
| 6            | PD     | 0.01416                                         | -1.84882 | 25.34002  | 1.40381     |
| 7            | PD     | 0.37851                                         | -0.42192 |           |             |
| 8            | PD     | 0.05666                                         | -1.24672 |           |             |
| 9            | PD     | 0.06708                                         | -1.17339 |           |             |
| 10           | PD     | 0.07142                                         | -1.14618 | 72.74038  | 1.86178     |
| 11           | PD     | 0.05793                                         | -1.23708 | 121.45916 | 2.08443     |
|              |        |                                                 |          |           |             |
| MEAN         |        | 0.09539                                         | -1.16940 | 69.07451  | 1.76826     |
| SEM          |        | 0.03074                                         | 0.10822  | 17.97827  | 0.13013     |
| N            |        | 11                                              | 11       | 5         | 5           |
| MAX          |        | 0.37851                                         | -0.42192 | 121.45916 | 2.08443     |
| QUARTILE 3   |        | 0.07607                                         | -1.11958 | 92.22716  | 1.96486     |
| MEDIAN       |        | 0.05816                                         | -1.23540 | 72.74038  | 1.86178     |
| QUARTILE 1   |        | 0.05517                                         | -1.25843 | 33.60584  | 1.52641     |
| MIN          |        | 0.01416                                         | -1.84882 | 25.34002  | 1.40381     |
| PD % of CON  |        | 30.0%                                           |          | 1835.8%   |             |
| p PD vs. CON |        |                                                 | 0.00424  |           | 0.00015     |

| HEART               | PD/CON | Cys-DOPA/DA     | Log Cys-DOPA/DA | (DOPA+Cys-DOPA)/(Sum of DA & Metabs.) |
|---------------------|--------|-----------------|-----------------|---------------------------------------|
| 1                   | CON    | 0.28873         | -0.53951        | 0.13735                               |
| 2                   | CON    | 0.23260         | -0.63339        | 0.22522                               |
| 3                   | CON    | 0.09843         | -1.00687        | 0.10851                               |
| 4                   | CON    | 2.06363         | 0.31463         | 1.15483                               |
| 5                   | CON    | 0.63770         | -0.19539        | 0.14762                               |
| 6                   | CON    | 0.01045         | -1.98091        | 0.03135                               |
| 7                   | CON    | 0.02852         | -1.54484        | 0.06810                               |
| 8                   | CON    | 0.00400         | -2.39750        | 0.01906                               |
| 9                   | CON    | 0.21427         | -0.66904        | 0.08405                               |
| 10                  | CON    | 0.02772         | -1.55727        | 0.03628                               |
| 11                  | CON    | 0.01467         | -1.83348        | 0.10336                               |
|                     |        |                 |                 |                                       |
| <b>MEAN</b>         |        | <b>0.32916</b>  | <b>-1.09487</b> | <b>0.19234</b>                        |
| <b>SEM</b>          |        | <b>0.18262</b>  | <b>0.25136</b>  | <b>0.09793</b>                        |
| <b>N</b>            |        | <b>11</b>       | <b>11</b>       | <b>11</b>                             |
| <b>MAX</b>          |        | <b>2.06363</b>  | <b>0.31463</b>  | <b>1.15483</b>                        |
| <b>QUARTILE 3</b>   |        | <b>0.26067</b>  | <b>-0.58645</b> | <b>0.14249</b>                        |
| <b>MEDIAN</b>       |        | <b>0.09843</b>  | <b>-1.00687</b> | <b>0.10336</b>                        |
| <b>QUARTILE 1</b>   |        | <b>0.02119</b>  | <b>-1.69537</b> | <b>0.05219</b>                        |
| <b>MIN</b>          |        | <b>0.00400</b>  | <b>-2.39750</b> | <b>0.01906</b>                        |
|                     |        |                 |                 |                                       |
| HEART               | PD/CON | Cys-DOPA/DA     | Log Cys-DOPA/DA | (DOPA+Cys-DOPA)/(Sum of DA & Metabs.) |
| 1                   | PD     |                 |                 | 10.89077                              |
| 2                   | PD     |                 |                 | 8.77273                               |
| 3                   | PD     |                 |                 | 30.12468                              |
| 4                   | PD     | 19.00396        | 1.27884         | 11.57272                              |
| 5                   | PD     | 2.35546         | 0.37208         | 7.78017                               |
| 6                   | PD     | 8.04026         | 0.90527         | 4.58860                               |
| 7                   | PD     |                 |                 | 93.72375                              |
| 8                   | PD     |                 |                 | 9.16370                               |
| 9                   | PD     |                 |                 | 23.72078                              |
| 10                  | PD     | 5.72173         | 0.75753         | 6.55932                               |
| 11                  | PD     | 12.03576        | 1.08047         | 6.18599                               |
|                     |        |                 |                 |                                       |
| <b>MEAN</b>         |        | <b>9.43143</b>  | <b>0.87884</b>  | <b>19.37120</b>                       |
| <b>SEM</b>          |        | <b>2.86516</b>  | <b>0.15377</b>  | <b>7.80617</b>                        |
| <b>N</b>            |        | <b>5</b>        | <b>5</b>        | <b>11</b>                             |
| <b>MAX</b>          |        | <b>19.00396</b> | <b>1.27884</b>  | <b>93.72375</b>                       |
| <b>QUARTILE 3</b>   |        | <b>12.03576</b> | <b>1.08047</b>  | <b>17.64675</b>                       |
| <b>MEDIAN</b>       |        | <b>8.04026</b>  | <b>0.90527</b>  | <b>9.16370</b>                        |
| <b>QUARTILE 1</b>   |        | <b>5.72173</b>  | <b>0.75753</b>  | <b>7.16974</b>                        |
| <b>MIN</b>          |        | <b>2.35546</b>  | <b>0.37208</b>  | <b>4.58860</b>                        |
| <i>PD % of CON</i>  |        | <i>2865.3%</i>  |                 | <i>10071.4%</i>                       |
| <i>p PD vs. CON</i> |        |                 | <i>0.00019</i>  |                                       |

| HEART        | PD/CON | Log ((DOPA+Cys-DOPA)/(Sum of DA & Metabs.)) |
|--------------|--------|---------------------------------------------|
| 1            | CON    | -0.86216                                    |
| 2            | CON    | -0.64740                                    |
| 3            | CON    | -0.96451                                    |
| 4            | CON    | 0.06252                                     |
| 5            | CON    | -0.83085                                    |
| 6            | CON    | -1.50377                                    |
| 7            | CON    | -1.16688                                    |
| 8            | CON    | -1.71998                                    |
| 9            | CON    | -1.07548                                    |
| 10           | CON    | -1.44031                                    |
| 11           | CON    | -0.98565                                    |
|              |        |                                             |
| MEAN         |        | -1.01223                                    |
| SEM          |        | 0.14461                                     |
| N            |        | 11                                          |
| MAX          |        | 0.06252                                     |
| QUARTILE 3   |        | -0.84651                                    |
| MEDIAN       |        | -0.98565                                    |
| QUARTILE 1   |        | -1.30359                                    |
| MIN          |        | -1.71998                                    |
|              |        |                                             |
| HEART        | PD/CON | Log ((DOPA+Cys-DOPA)/(Sum of DA & Metabs.)) |
| 1            | PD     | 1.03706                                     |
| 2            | PD     | 0.94313                                     |
| 3            | PD     | 1.47892                                     |
| 4            | PD     | 1.06344                                     |
| 5            | PD     | 0.89099                                     |
| 6            | PD     | 0.66168                                     |
| 7            | PD     | 1.97185                                     |
| 8            | PD     | 0.96207                                     |
| 9            | PD     | 1.37513                                     |
| 10           | PD     | 0.81686                                     |
| 11           | PD     | 0.79141                                     |
|              |        |                                             |
| MEAN         |        | 1.09023                                     |
| SEM          |        | 0.11436                                     |
| N            |        | 11                                          |
| MAX          |        | 1.97185                                     |
| QUARTILE 3   |        | 1.21928                                     |
| MEDIAN       |        | 0.96207                                     |
| QUARTILE 1   |        | 0.85392                                     |
| MIN          |        | 0.66168                                     |
|              |        |                                             |
| PD % of CON  |        |                                             |
| p PD vs. CON |        | 3.3E-10                                     |
